# Supplementary material
Source: PubMed Central journal article supplement (PMC6350008)
Supplement: mmc1.pdf [file mmc1.pdf]

**Biophysical Journal, Volume 116**

**Supplemental Information**

**Dynamics of Membrane-Bound G12V-KRAS from Simulations and Single-Molecule FRET in Native Nanodiscs**

**Priyanka Prakash, Douglas Litwin, Hong Liang, Suparna Sarkar-Banerjee, Drew Dolino, Yong Zhou, John F. Hancock, Vasanthi Jayaraman, and Alemayehu A. Gorfe**

**1) Reaction coordinates:** Figure S1 (top) shows that the distribution of the distance between C $\alpha$  atoms of residues 132 and 183 ( $\zeta$ ) sampled during the 20  $\mu$ s MD run could be fit to three Gaussians (blue, green and red). We used these fits to split the trajectory into three different pools of conformations:  $\zeta < 24$  Å,  $24 \leq \zeta \leq 43$  and  $\zeta > 43$  Å, representing 31.3%, 44.4% and 24.3% of the 200,000 conformations that we have saved during the simulation. Another reaction coordinate, the angle between a vector from residue 5 to residue 9 C $\alpha$  atoms and the membrane normal ( $\Theta$ ), was also able to similarly group the sample into three pools (Figure S1, bottom), with the two best-delineated groups being  $\Theta > 95^\circ$  and  $\Theta = 90^\circ$ .

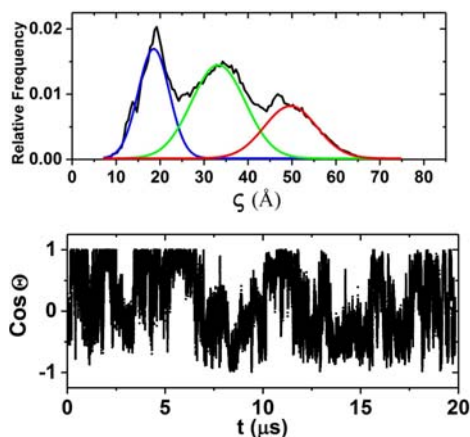

**Figure S1:** (Top) Normalized density distribution of  $\zeta$  fitted to three Gaussian with  $R^2 = 0.98$ . Distributions centered at peak values of  $18.56 \pm 0.10$  (blue),  $33.27 \pm 0.23$  (green), and  $49.67 \pm 0.48$  (red) correspond to OS<sub>1</sub>, OS<sub>0</sub> and OS<sub>2</sub> orientation states (see main text). (Bottom) Time evolution of the cosine of the angle between a vector along  $\beta$ 1 (residues 5-9) and the membrane normal ( $\Theta$ ).

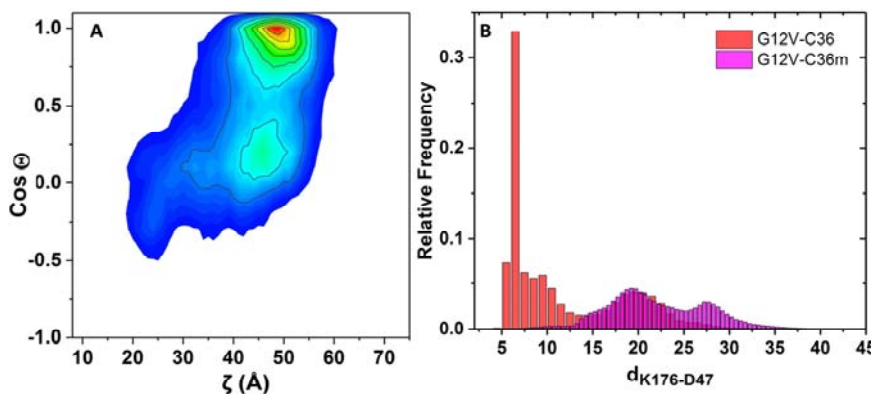

**Figure S2:** (A) Normalized number density distribution of conformations from the CHARMM36 simulation projected on to a plane defined by the reaction coordinates  $\zeta$  and  $\cos \Theta$ . (B) Histogram of distance between the C $\alpha$  atoms of an HVR residue K176 and D47 from the  $\beta$ 2- $\beta$ 3 loop region of lobe1 from simulations of G12V-KRAS using the CHARMM36 (C36) and CHARMM36m (C36m) force fields.

**2) Flow chamber preparation:** Glass coverslips (22 × 22 mm No. 1) were plasma cleaned and aminosilanized using Vectabond (Vectabond in acetone 2% vol/vol; Vector Laboratories). A section of the coverslip was isolated using silicone templates (Grace bio-Labs) and treated with a PEG solution containing 5 kDa biotin-terminated PEG (2.5% w/w in molecular biology grade (MB) water, NOF Corp.), and 5 kDa mPEG succinimidyl carbonate (25% w/w in MB water, Laysan Bio Inc.) in 0.1M sodium bicarbonate (Sigma-Aldrich) overnight. The day of the experiment, the coverslips were treated with short chain 333 Da NHS-ester PEG (Thermo Scientific) and incubated for 2–3 h. The excess PEG was then washed off and coverslips were dried with nitrogen gas. A flow chamber was then constructed using custom hybriwell chambers (Grace bio-Labs) with dual silicon press-fit tubing connectors (Grace bio-Labs).

**3) Protein preparation and attachment to coverslips:** Streptavidin in PBS was injected into the flow chamber and incubated for 10 min. 10nM biotinylated rabbit Anti-6XHis antibody (Rockland Inc., cat. no. 600-406-382) in PBS was then flowed into the chamber and incubated for 20 min. Intact, solubilized KRAS protein was then attached to a glass slide for FRET data acquisition using in situ immunoprecipitation<sup>1</sup> by passing the solubilized protein through the chamber in three 60 µL injections and incubating for 20 min before flushing the chamber with a reactive oxygen scavenging solution ROXS (1 mM methyl viologen, 1 mM ascorbic acid, 0.01% w/w glucose oxidase, 0.001% w/v catalase, 3.3% w/w glucose; all from Sigma-Aldrich).

### Supporting Reference

1. Jain, A.; Liu, R.; Ramani, B.; Arauz, E.; Ishitsuka, Y.; Ragunathan, K.; Park, J.; Chen, J.; Xiang, Y. K.; Ha, T., Probing cellular protein complexes using single-molecule pull-down. *Nature* **2011**, *473* (7348), 484-8
